# Supplementary material for: Evasion of cGAS and TRIM5 defines pandemic HIV
Source: PubMed Central journal article supplement (PMC9613477; doi:10.1038/s41564-022-01247-0), 2022-10-26

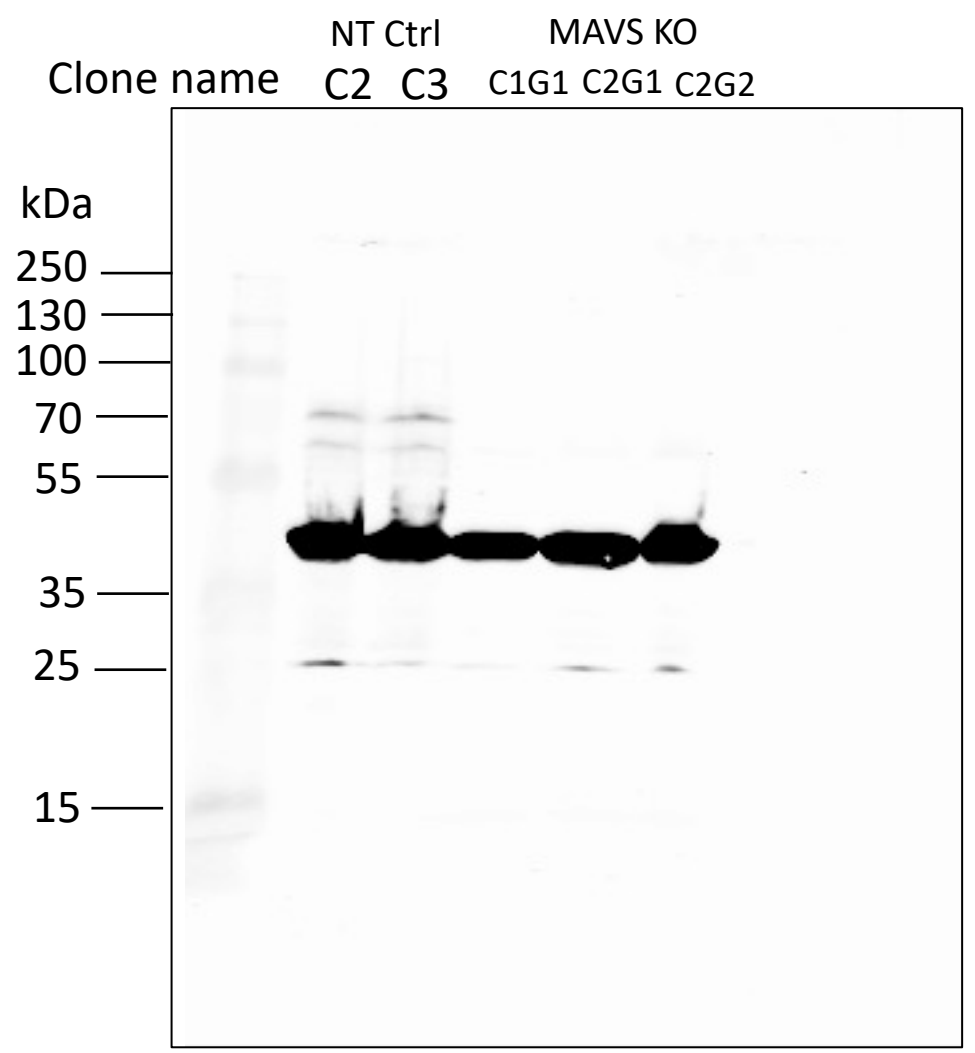

Supplement: 41564_2022_1247_MOESM12_ESM.pdf [file 41564_2022_1247_MOESM12_ESM.pdf]
